# Supplementary material
Source: Springer Nature journal article supplement (https://www.springermedizin.de/resource/supplementary/12916_2010_278_MOESM9_ESM.pdf/9599552)

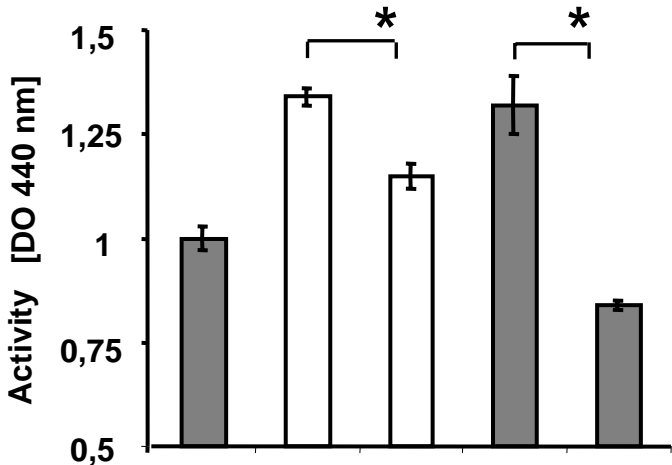

Anti-VEGF-A Ab

-

-

+

-

+

CM :

CTL

WR-1065

CTL+VEGF-A

Supplement: MOESM9 [file 9599552]
